# Supplementary material for: Enhanced thermal desorption of chlorinated hydrocarbons by nanoscale zero-valent iron: the effect of in situ dechlorination
Source: Royal Society of Chemistry journal article supplement (doi:10.1039/d4ra01077a), 2024-01-01
Supplement: d4ra01077a1.pdf [file d4ra01077a1.pdf]

## Supporting information

### **Enhanced thermal desorption of chlorinated hydrocarbons by nanoscale zero-valent iron: The effect of in-situ dichlorination**

Yi Zhu<sup>a</sup>, Xinlei Ren<sup>b</sup>, Minghui Xiang<sup>b\*</sup>

<sup>a</sup>Shanghai Chengtou Environmental Ecological Remediation Technology Co. LTD,  
Shanghai 200444, PR China

<sup>b</sup>Institute of Environmental Pollution and Health, School of Environmental and  
Chemical Engineering, Shanghai University, Shanghai 200444, PR China

\*Corresponding author

Email addresses: [xiangmh@shu.edu.cn](mailto:xiangmh@shu.edu.cn)

Tel.: +86-21-66137751

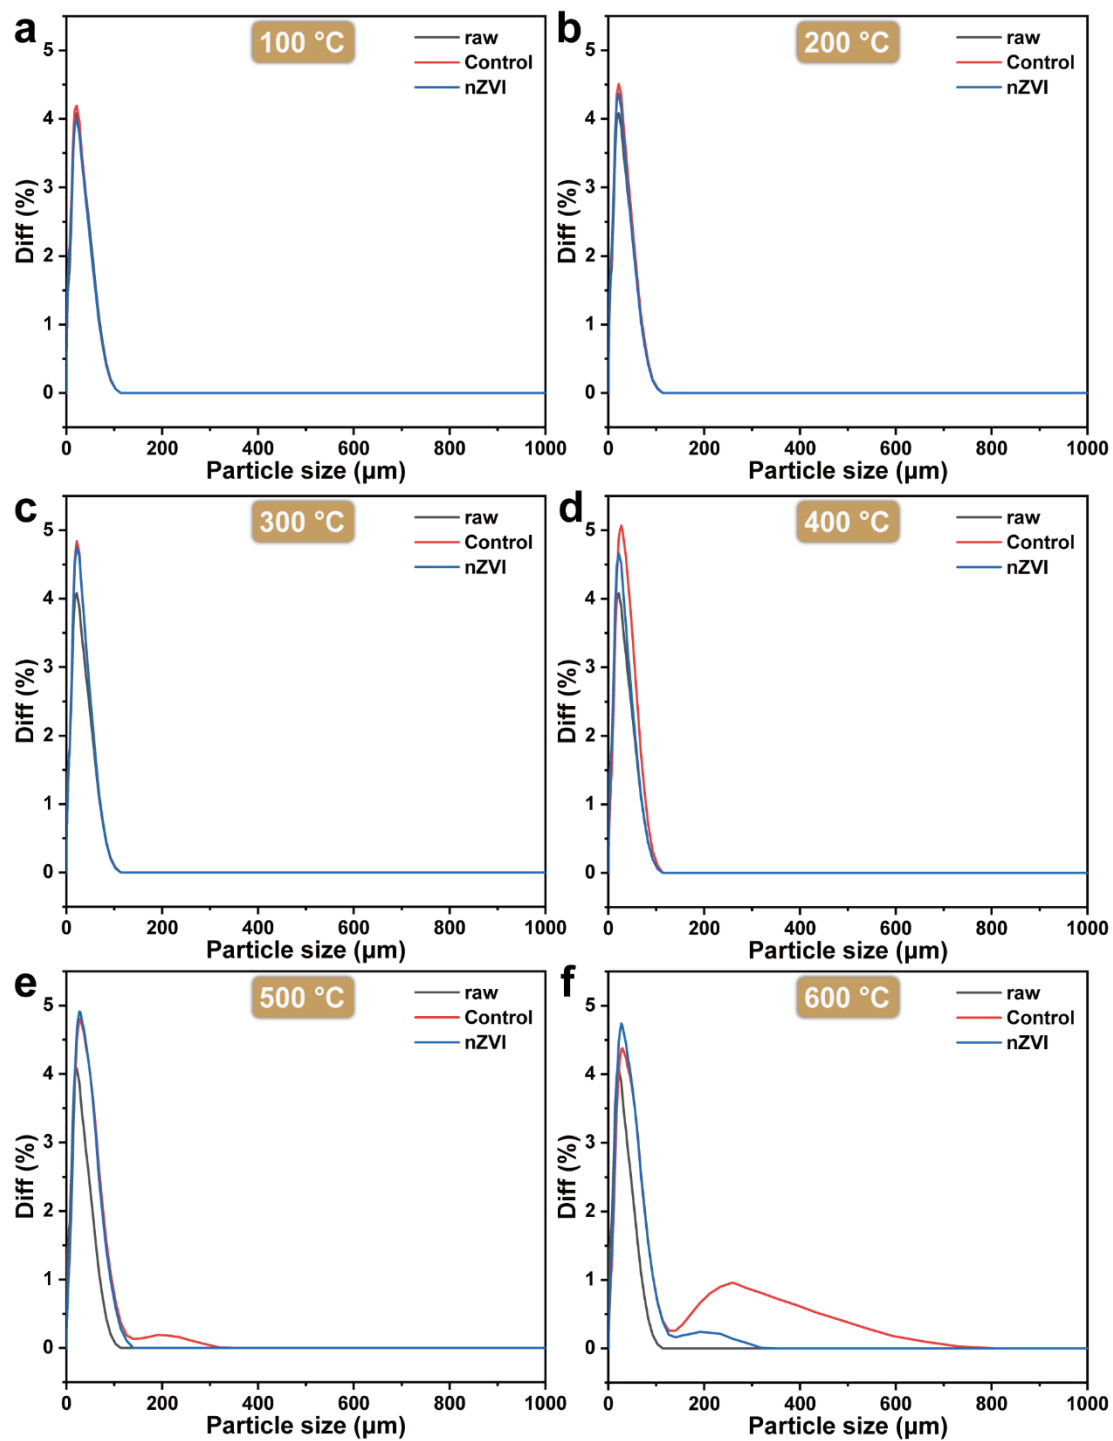

**Fig. S1.** The particle distribution of soil particles after thermal desorption at different temperatures.

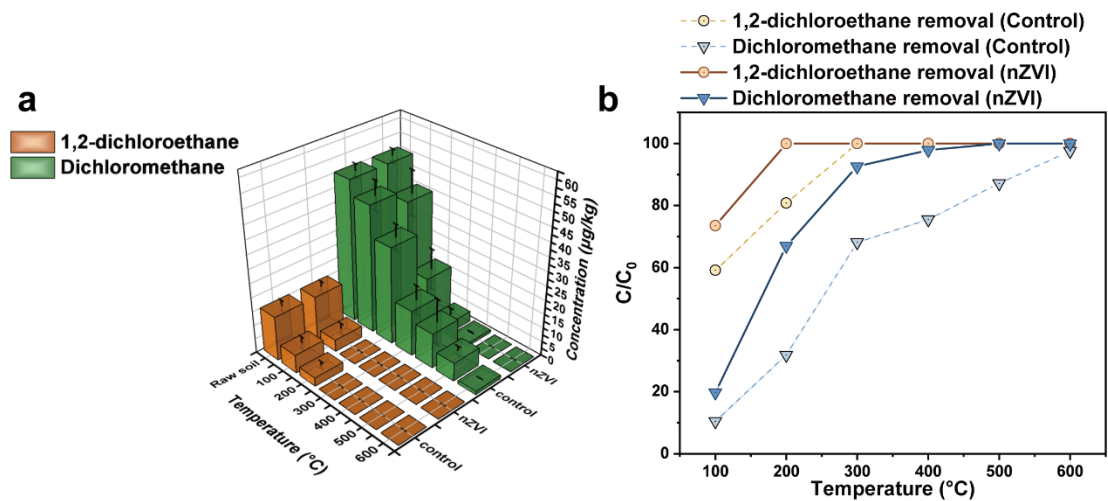

**Fig. S2.** (a) Concentration of 1,2-dichloroethane and dichloromethane in different soil samples and (b) removal efficiency of 1,2-dichloroethane and dichloromethane at different temperatures.

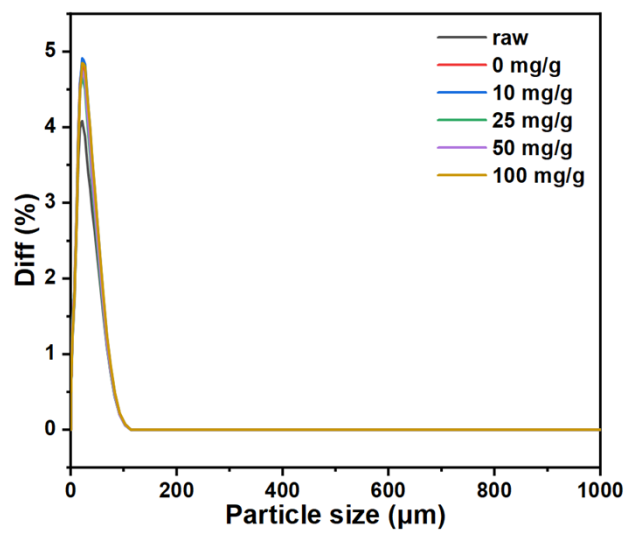

**Fig. S3.** The particle distribution of soil particles after thermal desorption with different nZVI dosages.

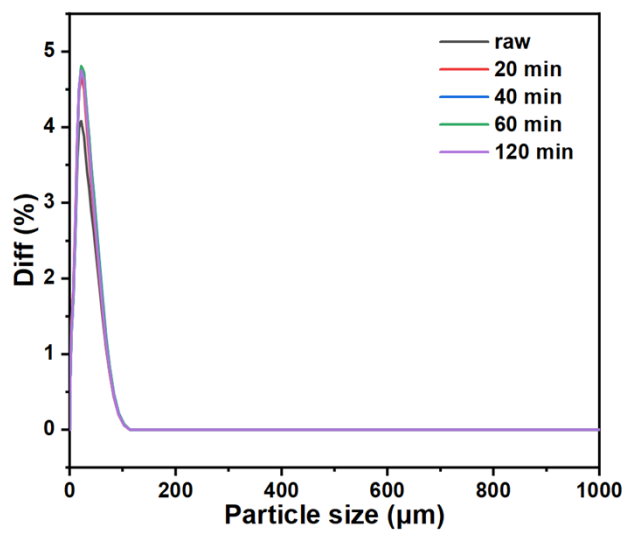

**Fig. S4.** The particle distribution of soil particles after thermal desorption for different times.
